# Supplementary material for: "Characteristics and Variability of Porcine Reproductive and Respiratory Syndrome Virus Strains: Implications for Virulence and Control - A Scoping Review"
Source: Research Square preprint supplement (doi:10.21203/rs.3.rs-3269113/v1), 2023-08-23
Supplement: Supplementary file 1 [file f29c076a3843219bd251310a.docx]

| **Supplementary file 1: Summary of characteristics of the experimental infection model studies selected.** | | | | | | | | | |
| --- | --- | --- | --- | --- | --- | --- | --- | --- | --- |
| LEAD AUTHOR (REFERENCE) | STRAIN | PRRSV TYPE | ANTIBODIES (S/P ratio) | PEAK VIRAL LOAD (DPI) | VIRAL LOAD (log10 copies/ mL) | CLINICAL SIGNS | LESIONS | AGE GROUP (WEEKS OLD) | Dose/Route |
|  |  |  |  |  |  |  |  |  | Log 10 TCID50/ml) |
| **(Brockmeier et al., 2012)** | NADC30 | Type 2, lineage 1 | SC= 10 DPI /0.8 | 5 | 3 | Mild | Mild | 5 | 4/IN |
|  | SDSU73 | Type 2, lineage 1. Like JA142, the parental strain of Ingelvac PRRS ATP | SC= 10 DPI / 0.9 | 5 | 4.5 | Moderate | Moderate | 5 | 4/IN |
|  | MN184 | Type 2, lineage 1. Like NADC20-NADC-31 | SC= 10 DPI / 1 | 7 | 5 | Mild | Moderate | 5 | 4/IN |
|  | NADC31 | Type2, lineage 1 | SC= 10 DPI / 0.4 | 14 | 2.5 | Mild | Mild | 5 | 4/IN |
| **(Guo et al., 2013)** | rJXwn06 | Type 2, lineage 1. Highly Pathogenic from China | SC= 14 DPI | - | 7 | Severe | Severe | 4 | 6/IN |
|  | VR-2332 | Type 2, lineage 1. U.S. prototype strain | SC=14 DPI | - | 4.5 | Mild | mild | 4 | 6/IN |
|  | rSRV07 | Type 2, lineage 1. Highly Pathogenic from Vietnam | No SC | - | 5.4 | Moderate | Moderate | 4 | 6/IN |
| **(Han, Seo, Park, et al., 2013)** | SNUVR100744 | Type 1, Subtype 1 pan European | 2 | 7 | 6 | Moderate | Moderate | 3 | 6/IN |
|  | SNUVR100834 | Type 1, Subtype 1 pan European | 1.7 | 10 | 5.5 | Mild | Mild | 3 | 6/IN |
|  | SNUVR100805 | Type 1, Subtype 1 pan European | 1.6 | 7 | 4.7 | Mild | Moderate | 3 | 6/IN |
|  | Lelystad | Type 1, Subtype 1 pan European | 1.8 | 10 | 5 | Mild | Mild | 3 | 6/IN |
| **(Han, Seo, Oh, et al., 2013)** | SNUVR100057 | Korean Type 1 | SC= 10 DPI/2.5 | 7 | 4.8 | Mild | Mild | 3 | 6/IN |
|  | SNUVR090851 | PRRSV 2 | SC= 10 DPI/3 | 10 | 5 | Mild | Moderate | 3 | 6/IN |
| **(Shang et al., 2013)** | HN-1/2008 | Type 2, lineage 1 | SC= 7 DPI/1.5 | 7 | - | Moderate | Moderate | 5 | 6/IN |
|  | YN-1/2008 | Type 2, lineage 1 | SC=7 DPI/1.9 | 3 | - | Mild | Moderate | 5 | 6/IN |
|  | GX-1/2008 | Type 2, lineage 1 | No SC | 0 | - | Mild | Mild | 5 | 6/IN |
|  | GX-1/2008F | Type 2, lineage 1 | SC=7 DPI/1 | 7 | - | Moderate | Moderate | 5 | 4/IN |
| **(Han et al., 2014)** | SNUVR100058 | Type 1 | SC=14 DPI/ 0.87 | - | 4.5 | Mild | Moderate | Gilts | 4/IN |
|  | SNUVR100059 | Type 2, lineage 1 | SC=14 DPI/1.01 | - | 5 | Mild | Moderate | Gilts | 4/IN |
| **(Liu et al., 2014)** | NT0801-F80 | Type 2, lineage 1. Attenuated strain | - | 6 | 4.8 | Mild | Mild | 4 | 6/IN |
|  | NT0801 | Type 2, lineage 1. Parental strain | - | 6 | 6 | Moderate | Moderate | 4 | 6/IN |
| **(Choi et al., 2015)** | SNUVR090485 | Type 1 pan European subtype 1 | SC= 10 DPI | 10 | 4 | Mild | Mild | 2 | 5/IN |
|  | Dual infection | Type 1 and Type 2 | SC= 10 DPI | - | - | Moderate | Moderate | 2 | 5/IN |
|  | SNUVR090851 | Type 2, lineage 1 | SC=10 DPI | 10 | 8 | Moderate | Moderate | 2 | 5/IN |
| **(Do et al., 2015)** | MB6 | Type 2, lineage 1, HP-PRRSV northern | SC=7 DPI/ 1.7 | 7 | 9 | Moderate | Severe | 4 | 5.5/IN |
|  | MN1 | Type 2, lineage 1, HP-PRRSV southern | SC=10 DPI/1.4 | 10 | 7.5 | Mild | Mild | 4 | 5.5/IN |
| **(Frydas et al., 2015)** | 13V091 | Type 1 pan European subtype 1, Highly pathogenic | SC=10 DPI | 10 | 3.9 | Moderate | Moderate | 12 | 5/IN |
|  | 13V117 | Type 1 pan European subtype 1 | SC= 7 DPI | 7 | 4 | Moderate | Moderate | 12 | 5/IN |
|  | 07V063 | Type 1 | SC= 10 DPI | 7 | 3 | Mild | Mild | 12 | 5/IN |
| **(Jiang et al., 2015)** | NT1 BJ | Type 2, lineage 8. JXA1-P80, a vaccine strain developed by passaging HP-PRRSV JXA1 in MARC-145. | - | 4 | - | Moderate | Moderate | 4 | 6/IM-IN |
|  | NT2 Henan-1 | Type 2, lineage 5, HP-PRRSV | - | 4 | - | Severe | Severe | 4 | 6/IM-IN |
|  | NT3 XH-GD | Type 2, lineage 8 | - | 4 | - | Moderate | Moderate | 4 | 6/IM-IN |
| **(Ladinig et al., 2015)** | NVSL 97-7895 | Type 2, lineage 1 | - | 2 | 4.9 | Moderate | Mild | Gilts | 5/IM-IN |
|  | KS06-483 | Type 2, lineage 1 | - | 2 | 3.2 | Mild | Mild | Gilts | 5/IM-IN |
|  | KS06-72109 | Type 2, lineage 1 | - | 7 | 4 | Mild | Mild | Gilts | 5/IM-IN |
| **(Sinn et al., 2016)** | AUT13-883 | Austrian type 1 | SC= 10 DPI/0.7 | 3 | 4 | Mild | Mild | 27 | 5/IN |
|  | AUT14-440 | Austrian type 1 | SC=10 DPI/1.7 | 3 and 7 | 6 | Moderate | Moderate | 27 | 5/IN |
|  | GER09-613 | German type 1, subtype 1 | SC= 10 DPI/0.6 | 13 | 5 | Mild | Mild | 27 | 5/IN |
| **(Sun et al., 2016)** | JXA1 | Type 2, lineage 1 | SC=8 DPI/1.6 | 6 | 8.85 | Severe | Severe | 6 | 4/IN |
|  | HNjz15 | Type 2 | SC= 8 DPI/1.5 | 6 | 8.7 | Moderate | Moderate | 6 | 4/IN |
| **(Bian et al., 2017)** | TJnh1501 | Type 2, lineage 8 | SC= 10 DPI | 5 | 5.5 | Moderate | Moderate | 6 | 5/IN |
|  | CHsx1401 | Type 2, NADC30-like Lineage 1 | SC= 14 DPI | 10 | 3.8 | Mild | Mild | 6 | 5/IN |
|  | JXwn06 | Type 2, lineage 1, HP-PRRSV | SC= 10 DPI | 14 | 6 | Severe | Severe | 6 | 5/IN |
| **(Liu et al., 2017)** | 14LY01-FJ | Type 2, JXA1-like HP-PRRSV-L8 | SC=7 DPI/1.6 | 7 | 6.4 | Severe | Severe | 4 | 5 |
|  | 14LY02-FJ | Type 2, JXA1-like HP-PRRSV-L8 | SC=7 DPI/1.3 | 7 | 5.3 | Moderate | Moderate | 4 | 5 |
|  | 15LY01-FJ | Type 2, JXA1-like HP-PRRSV-L8 | SC=7 DPI/ 1.4 | 7 | 5.5 | Moderate | Moderate | 4 | 5 |
|  | 15LY02-FJ | Type 2, JXA1-like HP-PRRSV-L8 | SC=7 DPI/ 1.5 | 7 | 6.2 | Severe | Severe | 4 | 5 |
|  | FJLYDX | Type 2, highly pathogenic | SC= 7 DPI/ 1.7 | 7 | 6.7 | Severe | Severe | 4 | 5 |
| **(Stadejek et al., 2017)** | 18794 | Type 1, subtype 1 | SC=7 DPI | 7 | 4 | Mild | Mild | 8 | 5.4/IN |
|  | ILI6 | Type 1, subtype 2 | SC=7 DPI | 7 | 4 | Mild | Mild | 8 | 6.8/IN |
|  | BOR59 | Type 1, subtype 2 | SC= 7 DPI | 7-Mar | 5 | Moderate | Moderate | 8 | 4.4/IN |
| **(Yuzhakov et al., 2017)** | WestSib13 | Type 1, Subtype 2, 76.2% (subtype 1 Lelystad virus) and 79.0% (subtype 3 Lena virus) | SC=6 | - | 5.5 | Severe | Severe | 3 | 4.7/IN-IM |
|  | Lelystad | Type 1, highly pathogenic | SC=12 | - | 2.5 | Mild | Mild | 3 | 4.7/IN-IM |
| **(Zhang et al., 2017)** | GD1404 | Type 2.  QYYZ with HP-PRRSV JXA1 | - | 4 | 6 | Moderate | Moderate | 15 | 6/IN-IM |
|  | BB0907 | Type 2, Subtype 1, Highly Pathogenic | - | 4 | 8 | Moderate | Moderate | 15 | 6/IN-IM |
| **(Ferrari et al., 2018)** | PR40/2014 | Type 1 | - | 7 | 6.03 | Mild | Mild | 4 | 5/ IN |
|  | PR11/2014 | Type 1 | - | 10 | 5.65 | Mild | Mild | 4 | 5/IN |
| **(Jeong et al., 2018)** | SNUVR090485 | Type 1, subtype 1 | - | 7 | 5 | Mild | Mild | Gilts | 5/IN |
|  | SNUVR090851 | Type 2, lineage 1 | - | 7 | 5 | Mild | Mild | Gilts | 5/IN |
|  | Dual infection | Type 1 and Type 2 | - | 7 | PRRSV 1=3 | Mild | Mild | Gilts | 5/IN |
|  |  |  |  |  | PRRSV 2=5 | |  |  |  |
| **(Wang et al., 2018)** | SC-d | Type 2, recombinant NADC30-like | SC=10/1.3 | - | - | Mild | Moderate | 25 | 5/IN |
|  | SD-19 | Type 2, non-recombinant strain | SC=10/0.9 | - | - | Mild | Mild | 25 | 5/IN |
|  | HuN4 | Type 2, highly pathogenic | SC=7/1.5 | - | - | Severe | Severe | 25 | 5/IN |
| **(Sun et al., 2019)** | GDZS2016 | Type 2, L 3, HP?PRRSVs; JXA1?like strain, lineage 8.7 | SC=7 | 7 | 5 | Mild | Mild | 4 | 5/IN-IM |
|  | FJNP2017 | Type 2, L 3, HP?PRRSVs; JXA1?like strain, lineage 8.7 | SC=7 | 7 | 9 | Moderate | Moderate | 4 | 5/IN-IM |
| **(Zhang et al., 2019)** | SD53-1603 | Type 2, NADC30-like minor parental PRRS MLV | - | - | 7.18 | Moderate | Moderate | 6 | 4/IN-IM |
| **(Zhou et al., 2019)** | GZgy17 | Type 2, L 3, Recombination lineage 3 (SH/CH/2016 like with JXA1-like (lineage 8) | SC=7/1.4 | 10 | 5 | Mild | Moderate | 4 | 5.3/IN |
|  | SCya18 | Type 2, L 3, Recombination lineage 3 (SH/CH/2016 like with NADC30-like (lineage 1) | SC=7/1.3 | 7 | 4.2 | Mild | Mild | 4 | 5.3/IN |
| **(Genís et al., 2020)** | Horsens strain | Type 1, recombinant | - | 10 | 4.45 | Moderate | Moderate | Gilts | 4/IN |
|  | Olot/91 | Type 1, field | - | 10 | 4.74 | Moderate | Moderate | Gilts | 4/IN |
| **(Song et al., 2020)** | HLJDZD32-1901 | PRRSV 2, sub lineage 1.5, NADC34-Like | SC=10/1.5 | 7 | 6.48 | Mild | Mild | 5 | 4/IN-IM |
| **(Xie et al., 2020)** | PRRSV-ZDXYL-China-2018-1 | Type 2, ORF5 RFLP 1-7-4-like PRRSV strain, Subline age 1.5 (NADC34-like) | 6 | 11 | 5.5 | Moderate | Moderate | 3 | 3/IM-IM |
|  | LQ-JXA1-like strain | Type 2, HP-PRRSV | 5 | 11 | 6 | Mild | Mild | 3 | 3/IN-IM |
| **(Wang et al., 2021)** | GDzj | Type 2, L 8.7, HP-PRRSV strain JXA1-like and CH-1a like | SC=10 | 7 | 5 | Moderate | Severe | 3 | 3/IN |
| **(Li et al., 2022)** | HN-YL1711 | Type 2, lineage 1, NADC30-like PRRSV and JXA1-like PRRSV | SC=11/0.4 | 7 | 8.3 | Mild | Mild | 4 | 5/IN-IM |
|  | JXA1 | Type 2, Highly Pathogenic | SC=7/0.4 | 7 | 7.8 | Moderate | Moderate | 4 | 5/IN-IM |
|  | LP-PRRSV CH1a | Type 2, recombinant strain with genetic material from PRRSV-1 lineage 3, PRRSV-2 lineage 1, and PRRSV-2 lineage 8 | SC=11/0.4 | 7 | 7 | Mild | Mild | 4 | 5/IN-IM |
| **(Liu et al., 2022)** | PRSSV2/ CN/SSO/2020 | Type 2, MLV strain TJM-F91 (derived from HP-PRRSV TJ), recombinant strains between lineages 1 (NADC30-like), 3 (QYYZ-like), and 8.7 (JXA1-like). | SC=10/0.4 | 7 | 6 | Moderate | Severe | 4 | 5/IN |
|  | PRRSV2/ CN/L3/2021 | Type 2 | SC=7/1.7 | 7 | 5 | Mild | Mild | 4 | 5/IN |
